# Supplementary figures and images for: Towards automated detection, semi-quantification and identification of microbial growth in clinical bacteriology: A proof of concept
Source: PubMed Central journal article supplement — Biomed J. 2017 Dec 26;40(6):317–28. doi: 10.1016/j.bj.2017.09.001 (PMC6138813; doi:10.1016/j.bj.2017.09.001), 2017-12-26

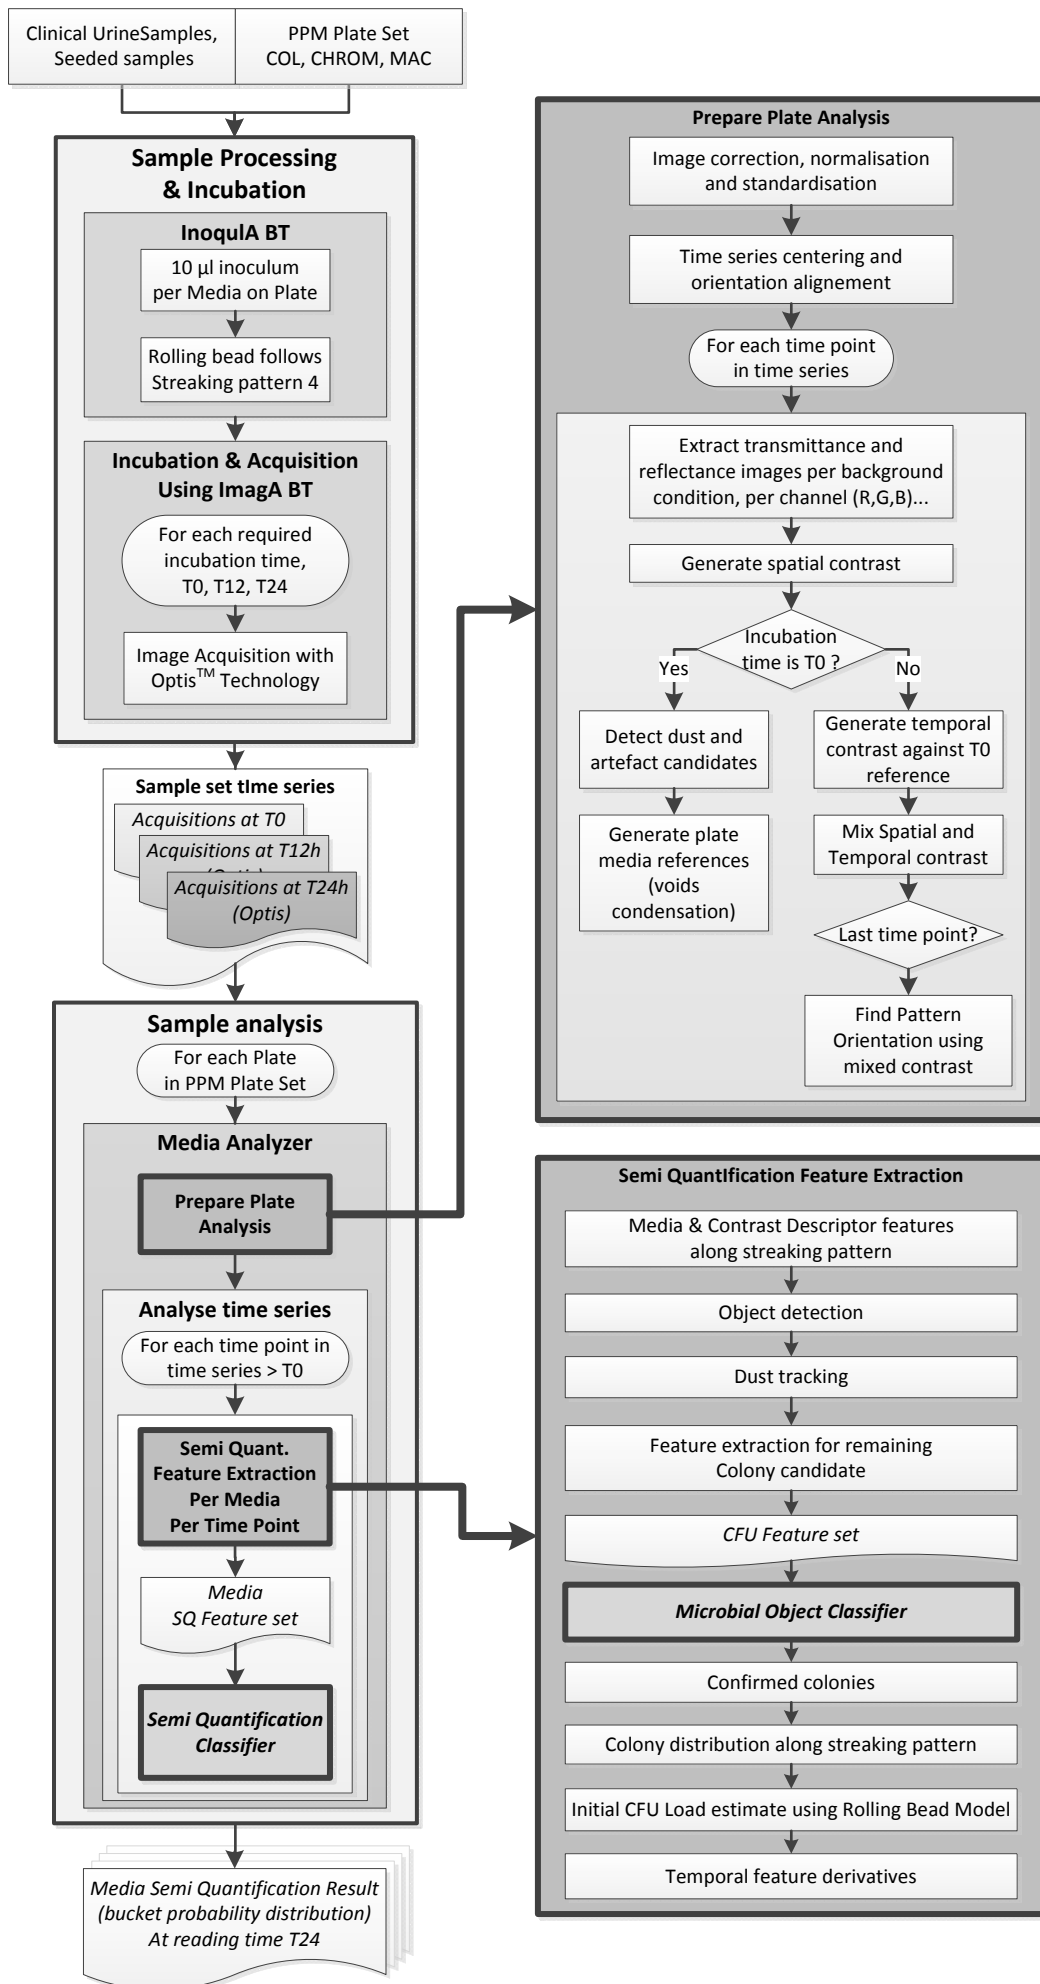

Fig. A.1

Supplement: mmc2.pdf [file mmc2.pdf]

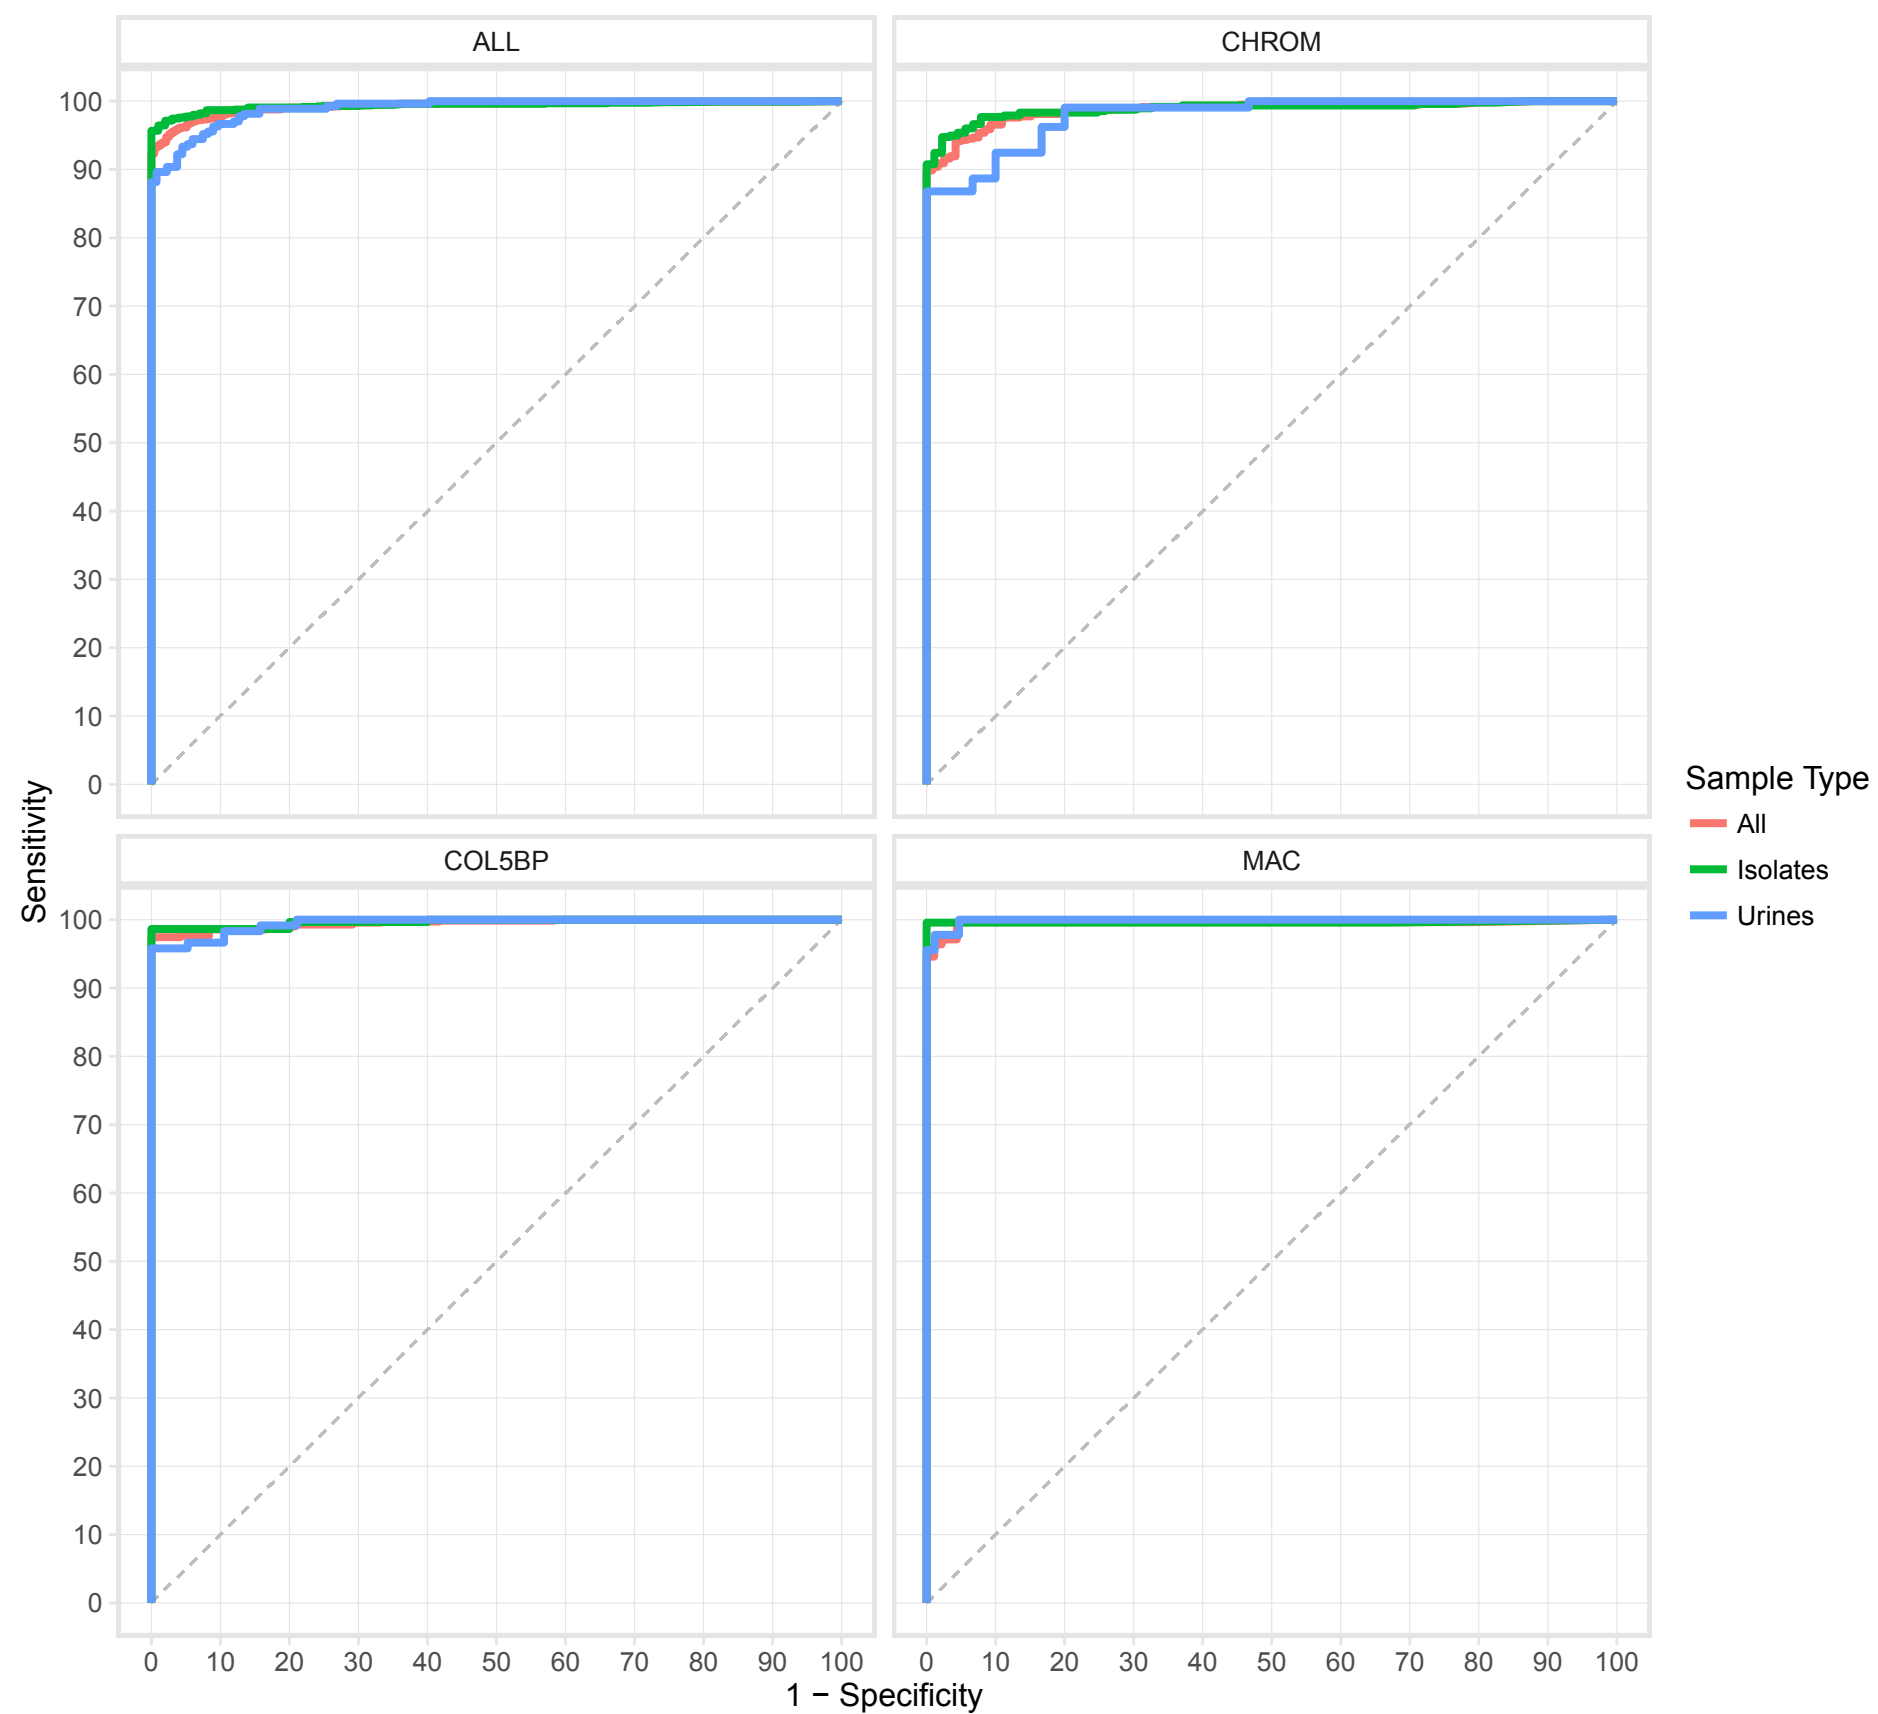

Fig. B.1

Supplement: mmc3.pdf [file mmc3.pdf]
